# Supplementary material
Source: PubMed Central journal article supplement (PMC3888086)
Supplement: NIHMS544047-supplement-01.pdf [file NIHMS544047-supplement-01.pdf]

## SUPPLEMENTAL MATERIAL

SUPPLEMENTAL TABLES

Supplemental table 1: Femoral artery balloon angioplasty model comparison with complete mixed-effect linear model results.

|                                       | <b>Single-injury</b> | <b>Double-injury</b> | <b>P</b> | <b>β coefficient (95% CI)</b> |
|---------------------------------------|----------------------|----------------------|----------|-------------------------------|
| <b>Quantitative analysis</b>          |                      |                      |          |                               |
| Percent luminal stenosis              | 5.5%(2.5-9.7)        | 11%(8.0-17)          | .002     | 7.7% (2.9 to 12)              |
| Neointimal thickness, mm              | .18(.08-.32)         | .13(.09-.24)         | .9       | .013 (-.15 to .18)            |
| Medial thickness, mm                  | .35(.31-.40)         | .51(.46-.54)         | <.001    | .13 (.094 to .17)             |
| Intima/media ratio                    | .08(.04-.16)         | .10(.07-.15)         | .5       | .028 (-.056 to .11)           |
| Adventitial microvessels              | 25(10-83)            | 11(9-15)             | .2       | -44 (-108 to 20)              |
| <b>Semi-quantitative analysis</b>     |                      |                      |          |                               |
| Injury                                | 2(0-3)               | 0(0-1)               | .4       | -3.3 (-11 to 4.3)             |
| Inflammation                          | 1(1-1)               | 1(1-1)               | .3       | -1.8 (-5.4 to 1.9)            |
| Medial fibrosis                       | 1.5(0-2)             | .5(0-1.5)            | .4       | -.87 (-2.7 to .99)            |
| Fibrin/thrombus                       | 0                    | 0                    | 1        | NS                            |
| Hemorrhage                            | 0                    | 0                    | 1        | NS                            |
| <b>Pigs (femoral injury sites), n</b> | <b>2(4)</b>          | <b>2(4)</b>          |          |                               |

All values are median(IQR).

Supplemental table 2. Histomorphometry and histology results at 28 days with complete mixed-effect linear model results.

|                                       | <b>Control</b> | <b>Nab-rapamycin</b> | <b>P</b> | <b>β coefficient (95% CI)</b> |
|---------------------------------------|----------------|----------------------|----------|-------------------------------|
| <b>Quantitative analysis</b>          |                |                      |          |                               |
| Lumen area, mm <sup>2</sup>           | 1.9(.85-2.6)   | 2.6(1.8-3.3)         | .04      | .73 (.022 to 1.45)            |
| Percent luminal stenosis              | 17%(12-35)     | 10%(8.3-14)          | .001     | -12% (-20 to -5.4)            |
| Neointimal area, mm <sup>2</sup>      | .38(.19-.57)   | .26(.22-.32)         | .04      | -.27 (-.52 to -.013)          |
| Neointimal thickness, mm              | .16(.096-.37)  | .096(.081-.19)       | .02      | -.16 (-.29 to -.029)          |
| Medial thickness, mm                  | .51(.41-.53)   | .45(.37-.53)         | .63      | -.019 (-.098 to .059)         |
| Intima/media ratio                    | .13(.087-.21)  | .099(.088-.14)       | .05      | -.090 (-.18 to 0)             |
| Total vessel area, mm <sup>2</sup>    | 6.8(5.0-7.3)   | 6.6(5.7-8.0)         | .1       | .80 (-.26 to 1.8)             |
| Adventitial microvessels              | 15(9-22)       | 7(3-10)              | .001     | -9.6 (-15 to -4)              |
| <b>Semi-quantitative analysis</b>     |                |                      |          |                               |
| Injury                                | 1(0-1.5)       | 1(0-1)               | 1        | -.025 (-1.1 to 1.0)           |
| Inflammation                          | 1(1-1)         | 1(1-1)               | .6       | .45 (-1.4 to 2.3)             |
| Medial fibrosis                       | 1(1-2)         | .5(0-1)              | <.001    | -2.6 (-4.0 to -1.2)           |
| Fibrin/thrombus                       | 0              | 0                    | .6       | -.36 (-1.8 to 1.1)            |
| Hemorrhage                            | 0              | 0                    | 1        | NS                            |
| <b>Pigs (femoral injury sites), n</b> | <b>2(4)</b>    | <b>2(4)</b>          |          |                               |

All values are median(IQR).

Supplemental table 3: Complete mixed-effects linear model results for Figures 2, 4 and 5.

|                              | <b>Control</b> | <b>Nab-rapamycin</b> | <b>P</b> | <b>β coefficient (95% CI)</b> |
|------------------------------|----------------|----------------------|----------|-------------------------------|
| <b>Figure 2:</b>             |                |                      |          |                               |
| <b>Endothelialization</b>    |                |                      |          |                               |
| 3d                           | 3 (2-3)        | 2 (2-2)              | <.001    | -20 (-21 to -18)              |
| 8d                           | 3 (2-3)        | 3 (3-3)              | .3       | 1.8 (-1.4 to 5.0)             |
| 28d                          | 3 (2.5-3)      | 3 (3-3)              | .6       | .85 (-2.0 to 3.7)             |
| <b>Figure 4: Adventitial</b> |                |                      |          |                               |
| <b>WBC</b>                   |                |                      |          |                               |
| 3d                           | 130 (123-148)  | 92 (88-115)          | <.001    | -34 (-47 to -21)              |
| 8d                           | 125 (84-150)   | 87 (74-104)          | .2       | -32 (-81 to 16)               |
| 28d                          | 52 (48-55)     | 48 (39-77)           | .7       | 4.2 (-18 to 26)               |
| <b>Figure 5: Medial cell</b> |                |                      |          |                               |
| <b>proliferation index</b>   |                |                      |          |                               |
| 8d                           | 13 (8.6-16)    | 3.2 (.8-10)          | .02      | -6.1 (-11 to -1.0)            |
| 28d                          | 6.5 (5.5-7.7)  | 1.5 (1.3-2)          | <.001    | -4.7 (-6.0 to -3.4)           |

All values are median (IQR).
